# Supplementary material for: A Ni–N–C catalyst for CO2 electroreduction based on the MOF@MOF configuration exhibiting wide active reaction sites
Source: Royal Society of Chemistry journal article supplement (doi:10.1039/d4qi02293a), 2024-12-04
Supplement: d4qi02293a1.pdf [file d4qi02293a1.pdf]

## Supplementary Information

### Ni-N-C catalyst for CO<sub>2</sub> electroreduction based on MOF@MOF configuration exhibiting wide active reaction sites

Chul Hyun Jun<sup>a</sup>, Chandan Chandru Gudal<sup>a</sup>, Sampath Prabhakaran<sup>b</sup>, Anki Reddy Mule<sup>a</sup>, Pil J. Yoo<sup>a</sup>, Do Hwan Kim<sup>\*c</sup>, Chan-Hwa Chung<sup>\*a</sup>

<sup>a</sup> School of Chemical Engineering, Sungkyunkwan University (SKKU), Suwon 16419, Republic of Korea

<sup>b</sup> Department of Nano Convergence Engineering (BK21 FOUR), Jeonbuk National University, Jeonju, Jeonbuk, 54896, Republic of Korea

<sup>c</sup> Division of Science Education, Department of Energy Storage/Conversion Engineering (BK21 FOUR), Jeonbuk National University, Jeonju, Jeonbuk, 54896, Republic of Korea

[\\*dhk201@jbnu.ac.kr](mailto:*dhk201@jbnu.ac.kr), [chchung@skku.edu](mailto:chchung@skku.edu)

#### Computational calculation method

Spin-polarized DFT calculations were conducted using the Vienna ab initio simulation package,<sup>1,2</sup> employing a projector-augmented Plane-wave pseudopotential with a cutoff energy of 400 eV for valence electrons. The generalized gradient approximation, specifically the Perdew–Burke–Ernzerhof (PBE) form, was utilized for exchange–correlation potentials.<sup>3,4</sup> To account for van der Waals interaction, the DFT-D3 method proposed by Grimme was applied to correct dispersion forces.<sup>5</sup> The simulations were performed on a two-dimensional layer with vacuum regions extending approximately 16 Å along Z-directions to prevent interaction between layers. For optimization, the Brillouin zone was sampled by 4 × 4 × 1.

The adsorption energy ( $E_{ad}$ ) for the adsorbate on the catalyst is expressed by the formula  $E_{ad} = E_{ads/cat} - E_{ads} - E_{cat}$ , where  $E_{ads/cat}$  represents the total energy of the slab with the adsorbate,  $E_{ads}$  is the energy of an adsorbed molecule, and  $E_{cat}$  is the energy of the clean catalyst substrate. The calculation of the Gibbs free energy change ( $\Delta G$ ) was performed for the reaction mechanism outlined in equations (1)-(3).<sup>6</sup>

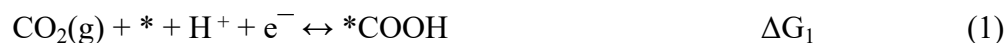

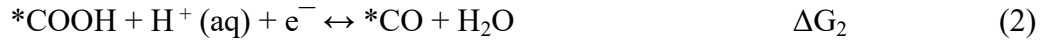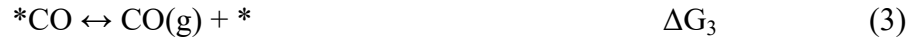

The \* denotes the active site on the substrate, while \*COOH and \*CO signify intermediate species adsorbed on the active sites of the catalyst. Electrochemical reduction of CO<sub>2</sub> can lead to a various range of products. The Gibbs free energy change for the adsorption of the molecule was computed using the equation (4):<sup>5</sup>

$$\Delta G_{\text{ads}*} = E_{\text{ads/cat}} - E_{\text{ads}} - E_* + \Delta E_{\text{ZPE}} - T\Delta S \quad (4)$$

where  $\Delta E_{\text{ZPE}}$  and  $\Delta S$  are the vibrational zero-point energy change and the entropy change, respectively.  $\Delta G_1$ ,  $\Delta G_2$ , and  $\Delta G_3$  are Gibbs free energy changes in each reaction step.

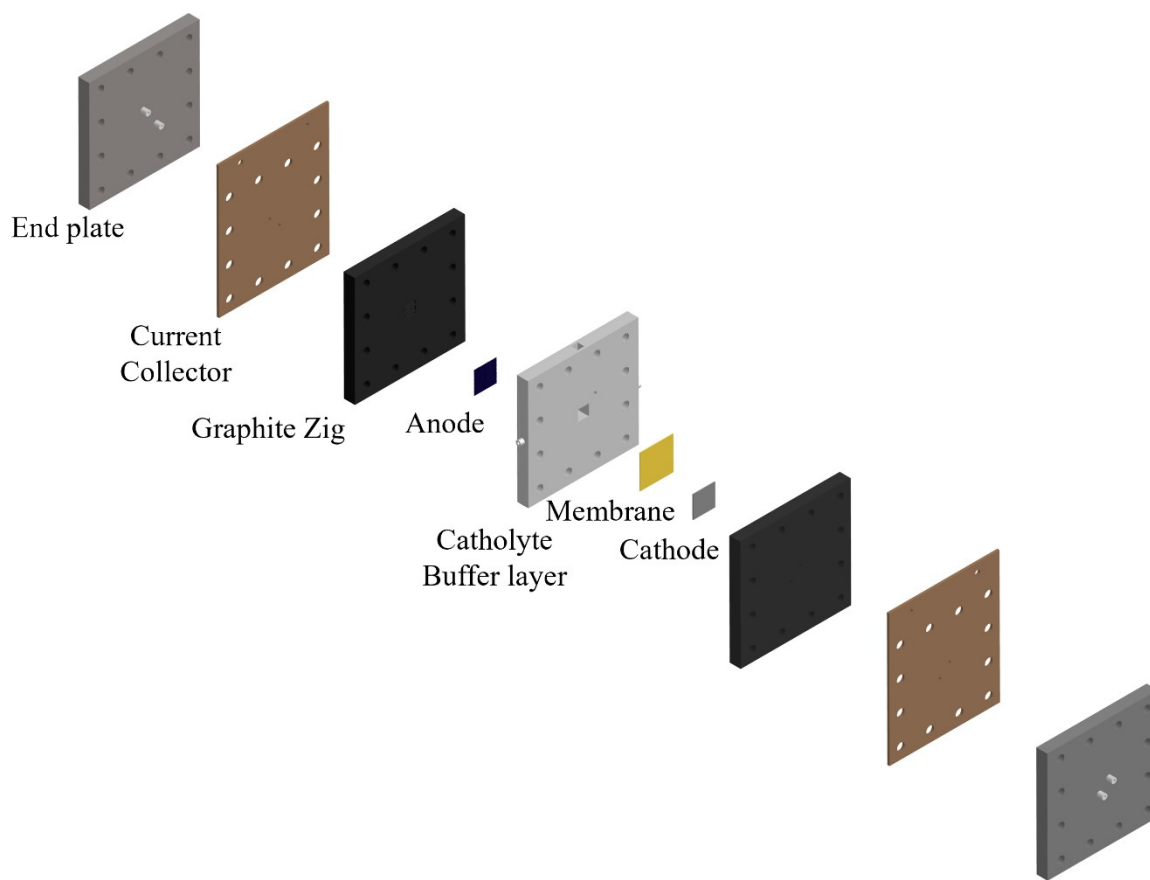

**Fig. S1.** Schematic diagram of a flow cell.

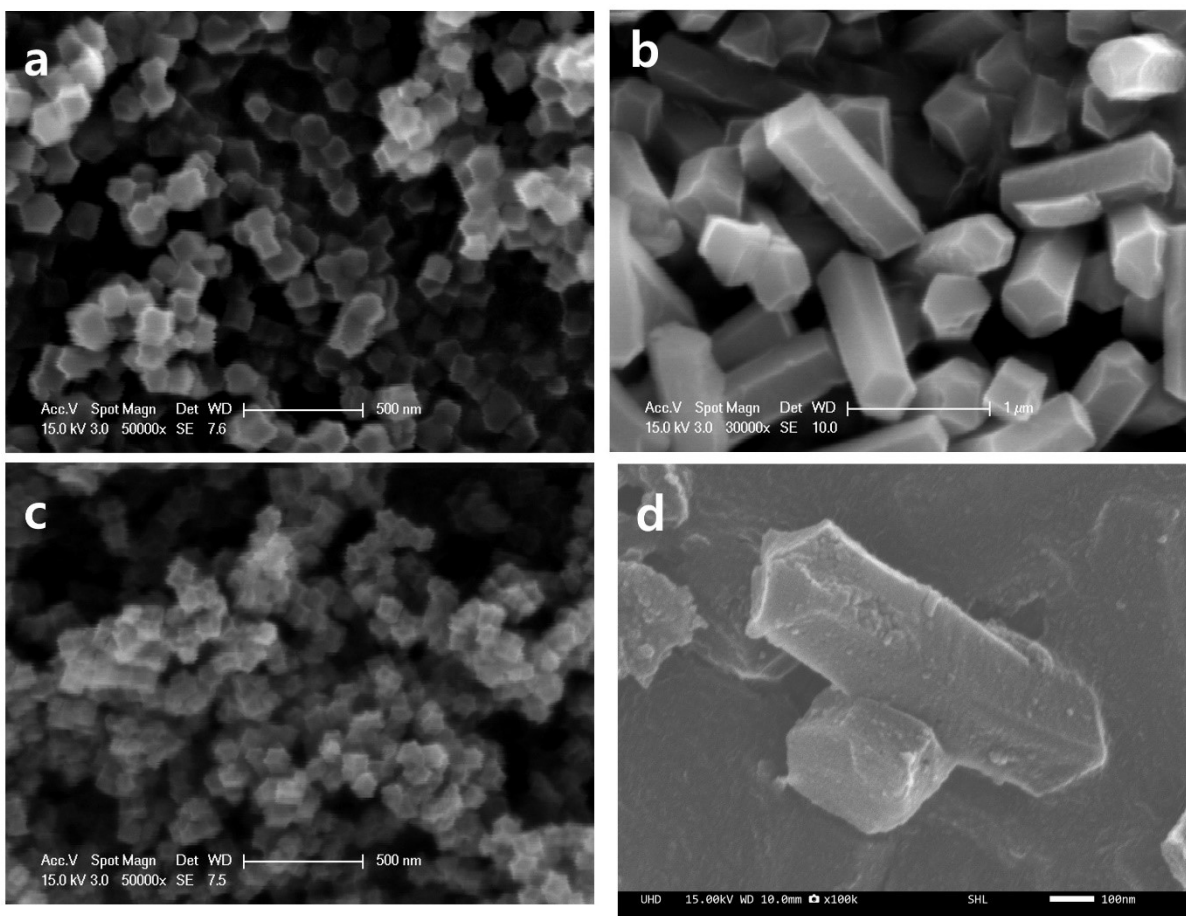

**Fig. S2.** SEM images of a) ZIF-8(Ni), b) MOF-74, c) Ni-N-C-8 and d) P-MOF-74.

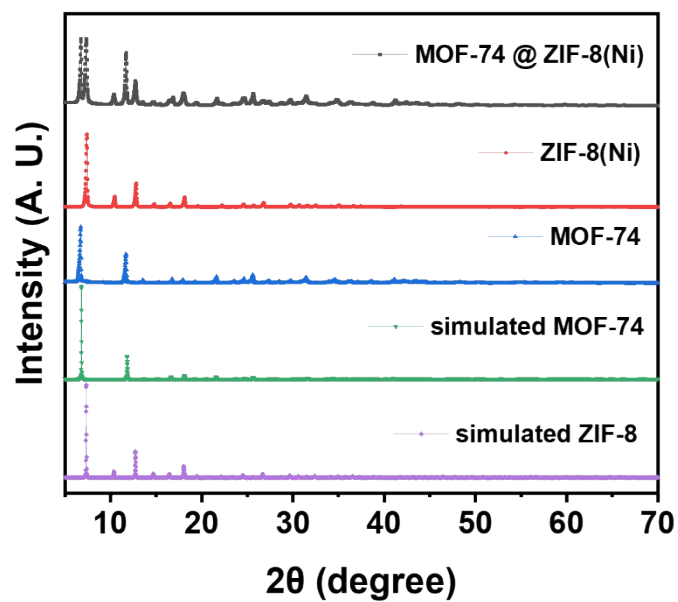

**Fig. S3.** XRD spectra of MOF-74@ ZIF-8(Ni), ZIF-8(Ni), MOF-74, simulated MOF-74 and simulated ZIF-8.

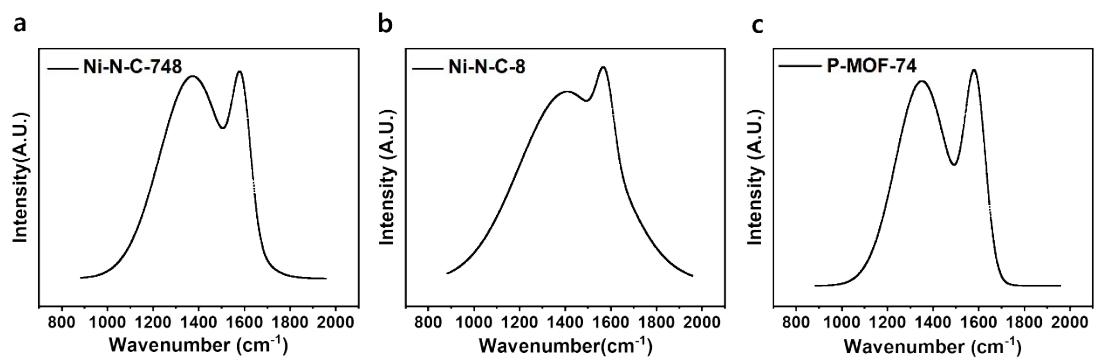

**Fig. S4.** Raman spectra of a) Ni-N-C-748, b) Ni-N-C-8 and c) P-MOF-74.

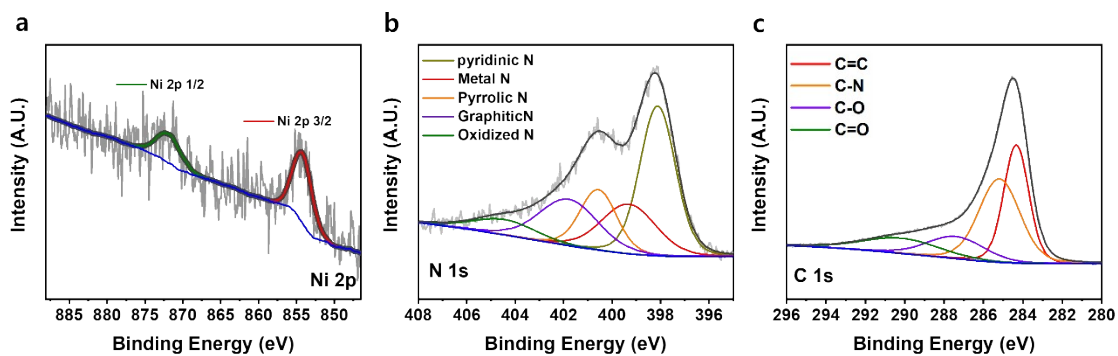

**Fig. S5.** a) Ni 2p, b) N 1s, and c) C 1s XPS spectra of Ni-N-C-8.

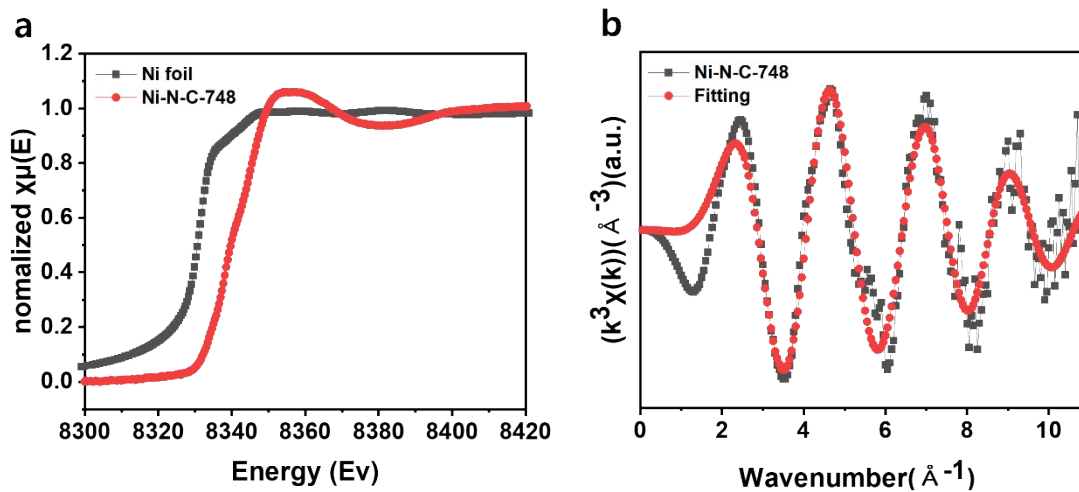

**Fig. S6.** a) XANES spectra of Ni-N-C 748 and Ni foil, b) the k-space EXAFS of Ni-N-C-748 at Ni K edge.



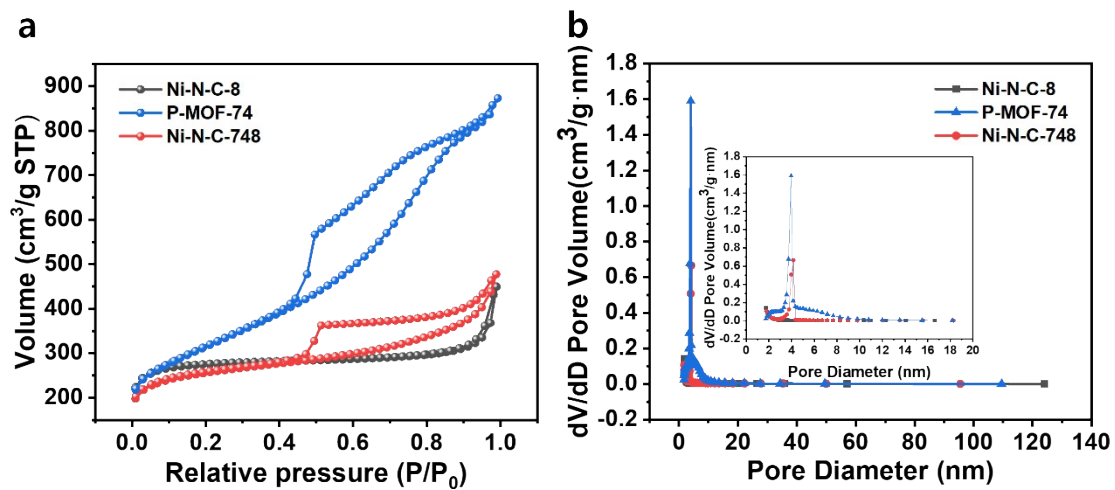

**Fig. S7.** a) The  $N_2$  adsorption-desorption isotherms and pore size distributions of Ni-N-C-748, Ni-N-C-8 and P-MOF-74.

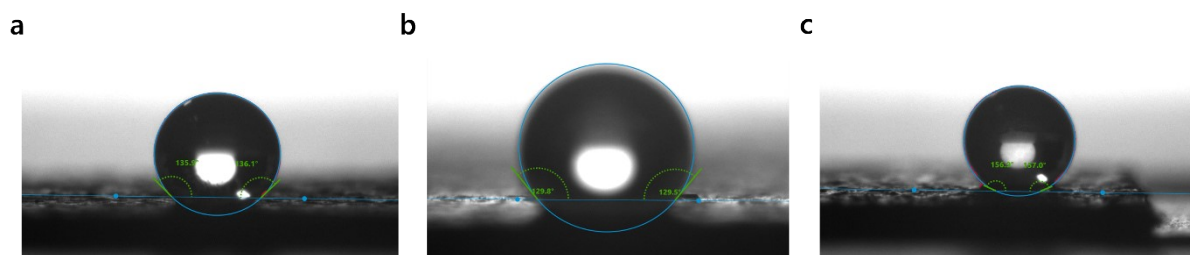

**Fig. S8.** Contact angle measurements of a) Ni-N-C-748, b) Ni-N-C-8 and c) P-MOF-74.

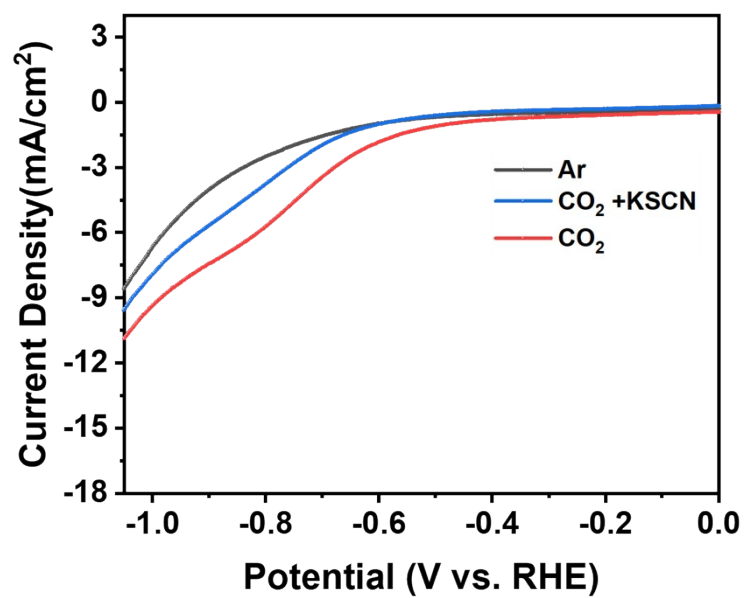

**Fig. S9.** LSV test in 0.5M KHCO<sub>3</sub> with purged Ar, CO<sub>2</sub> and CO<sub>2</sub> with KHCO<sub>3</sub>.

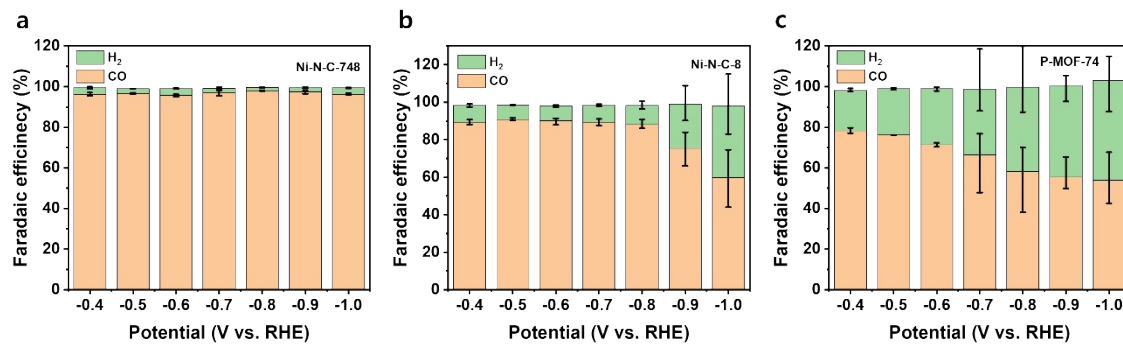

**Fig. S10.** F.E. of a) Ni-N-C-748, b) Ni-N-C-8 and c) P-MOF-74.

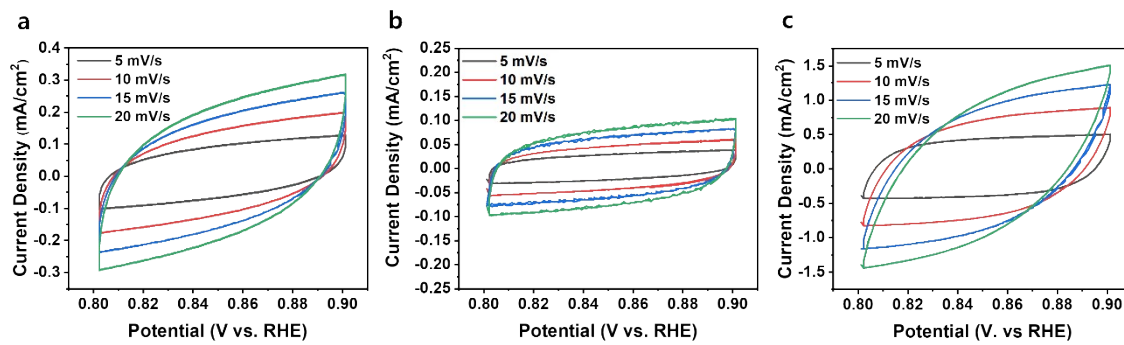

**Fig. S11.** ECSA test of a) Ni-N-C-748, b) Ni-N-C-8 and c) P-MOF-74.

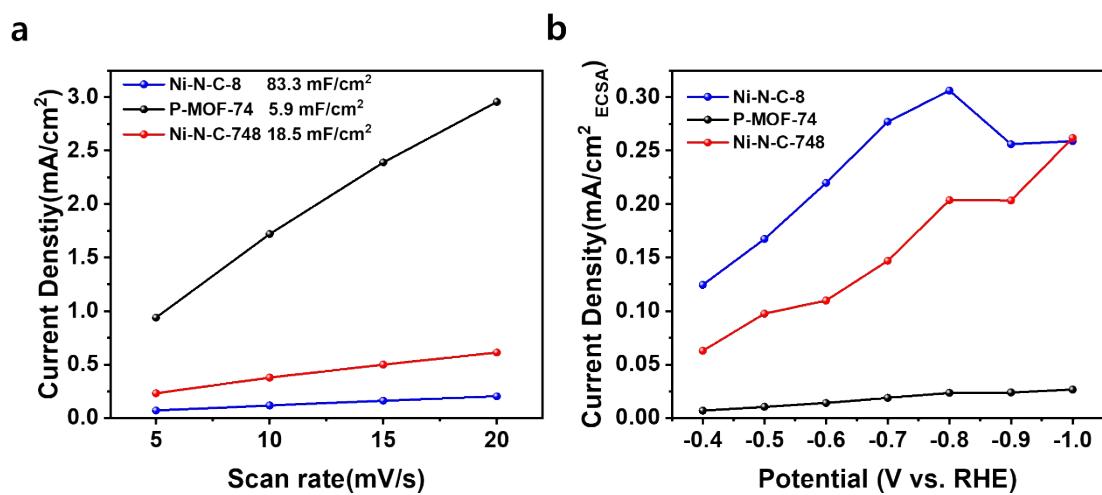

**Fig. S12.** a) ECSA capacitive current against scan rate and b) current density normalized with ECSA. ECSA result is as follows: Ni-N-C-748: 925.2 cm<sup>2</sup>, Ni-N-C-8: 293.4 cm<sup>2</sup>, P-MOF-74: 4167.4 cm<sup>2</sup>.

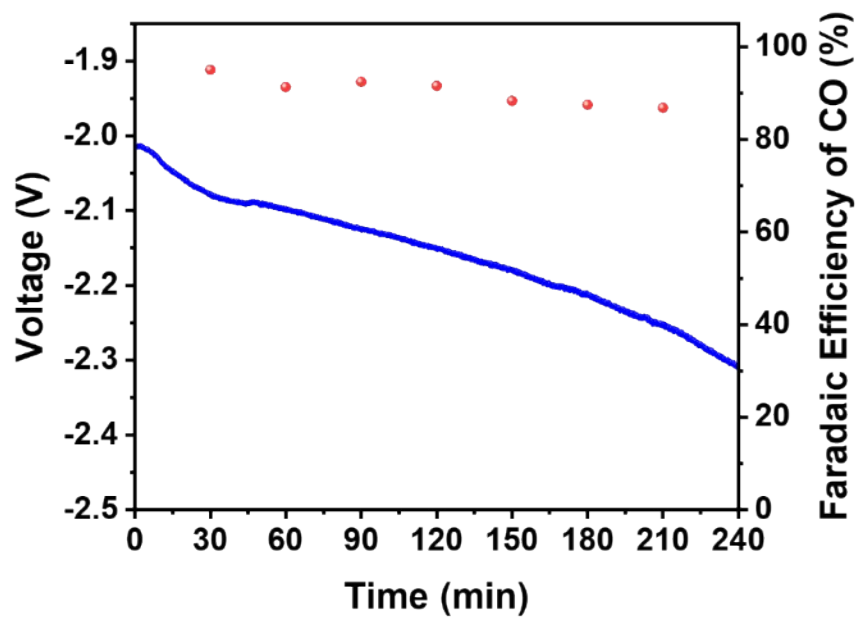

**Fig. S13.** Long-term stability test in the MEA cell without PTFE layer with humidified CO<sub>2</sub>.

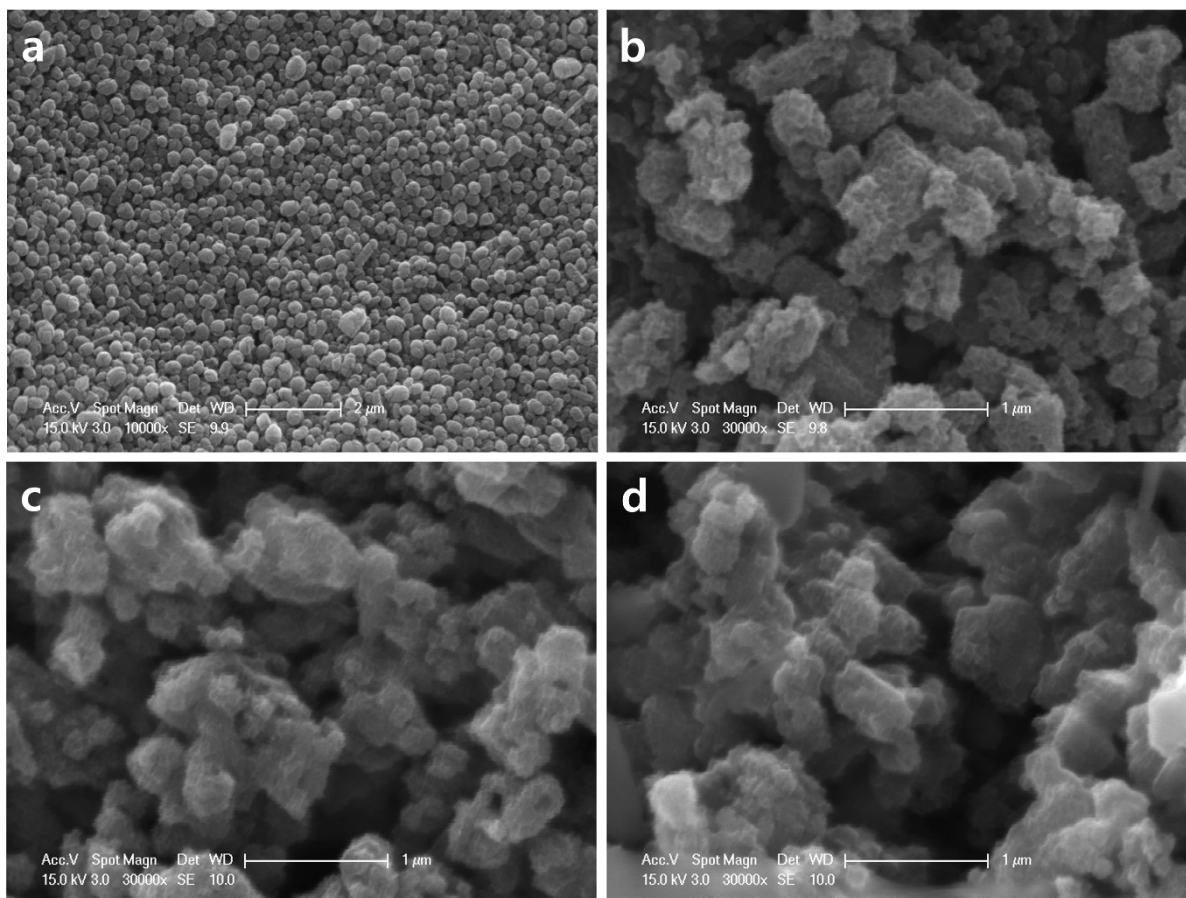

**Fig. S14.** SEM images of Ni-N-C-748 with PTFE layer a) before and b) after stability test. SEM images of Ni-N-C-748 without PTFE layer c) before and d) after stability test.



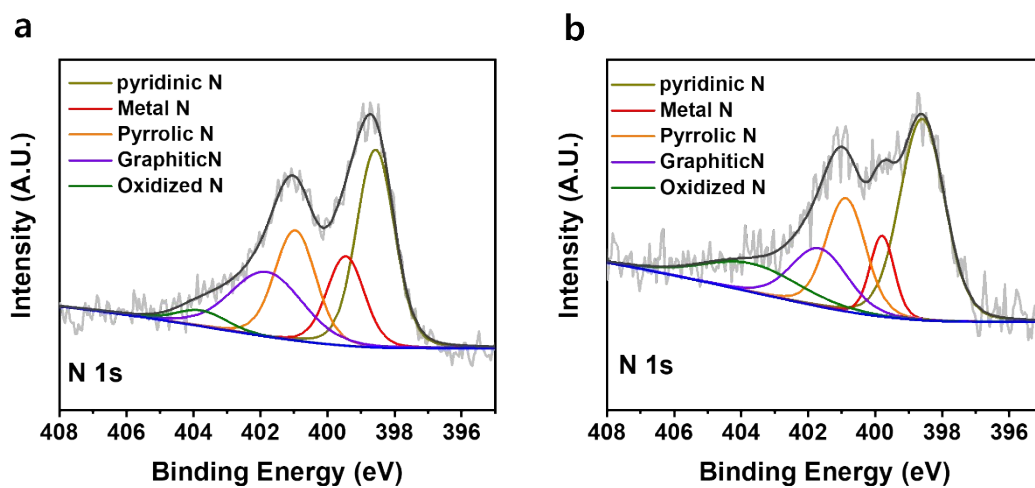

**Fig. S15.** N 1s XPS spectra of Ni-N-C-748 a) before and b) after stability test.

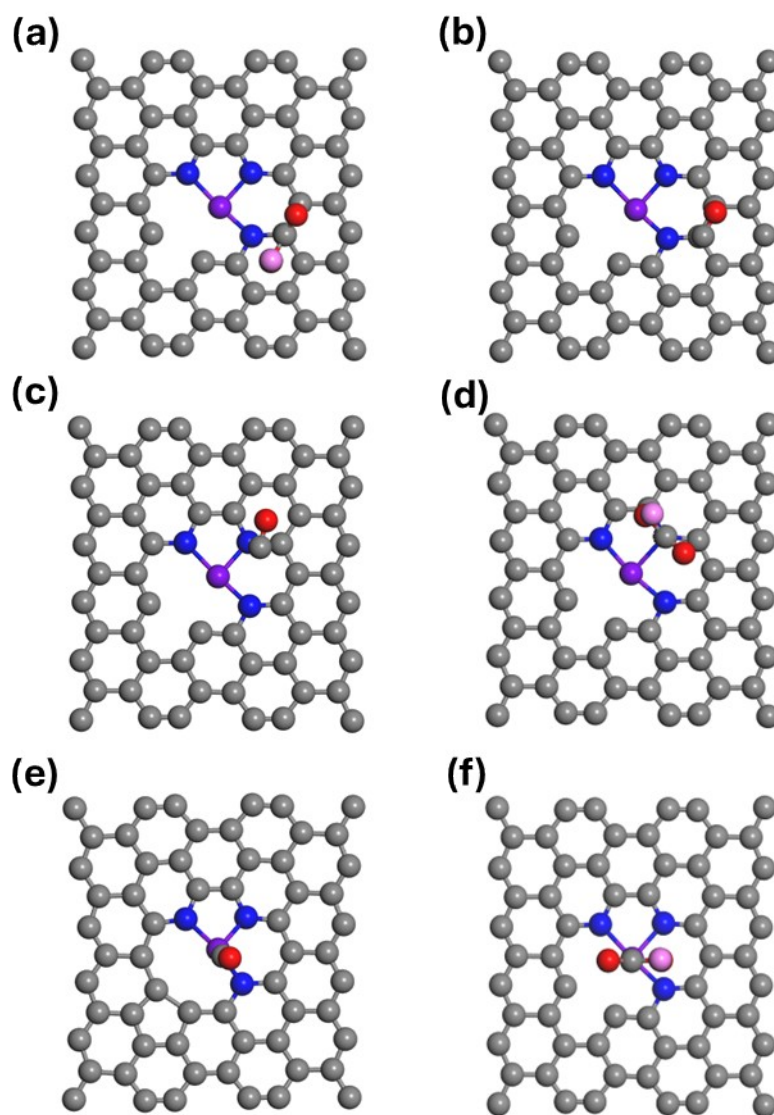

**Fig. S16.** Calculated DFT results for the adsorbed intermediates on different active sites on the surface of Ni-N<sub>3</sub>C. The Figure shows a top view of the slab model for the adsorption of \*COOH and \*CO on the active sites of (a-b) C, (c-d) N, and (e-f) Ni, respectively. The following color scheme is used for the atoms: gray - C, blue - N, purple - Ni, red - O, and pink - H

**Table S1.** Parameters from fitting EXAFS at Ni K edge

CN: coordination number, R: bond distance,  $\Delta E_0$ : edge energy correction, R factor: goodness of fitting,  $\sigma^2$ : Debye-Waller factor related with thermal and structural disorders.

$S_0^2$ : amplitude reduction factor is obtained by Ni foil of EXAFS fitting reference.<sup>7</sup>

| <b>Catalyst</b> | <b>Path</b> | <b>CN</b> | <b>R(<math>\text{\AA}</math>)</b> | <b><math>\Delta E_0</math></b> | <b><math>\sigma^2</math></b> | <b>R factor</b> |
|-----------------|-------------|-----------|-----------------------------------|--------------------------------|------------------------------|-----------------|
| Ni-N-C-748      | Ni-N        | 2.84      | 1.8655                            | -0.850                         | 0.00982                      | 0.00262         |

**Table S2.** The surface area and total pore volume of catalyst derived from N<sub>2</sub> adsorption/desorption isotherm

| <b>Catalyst</b> | <b>BET surface area (m<sup>2</sup>/g)</b> | <b>Total pore volume (cm<sup>3</sup>/g)</b> |
|-----------------|-------------------------------------------|---------------------------------------------|
| Ni-N-C-748      | 820.0844                                  | 0.738417                                    |
| Ni-N-C-8        | 830.0983                                  | 1.350105                                    |
| P-MOF-74        | 1077.1200                                 | 0.695266                                    |

**Table S3.** Calculated Gibbs free energy values for the catalytic systems

| <b>Catalyst</b>      | <b>Active site</b> | <b>Gibbs energy change (eV)</b> |              |              |
|----------------------|--------------------|---------------------------------|--------------|--------------|
|                      |                    | $\Delta G_1$                    | $\Delta G_2$ | $\Delta G_3$ |
| Ni-N <sub>3</sub> -C | Ni                 | 0.952                           | -1.456       | 0.712        |
|                      | N                  | 1.577                           | -0.678       | -0.691       |
|                      | C                  | 1.922                           | -0.804       | -0.910       |

## References

1. G. Kresse and J. Furthmüller, Efficient iterative schemes for ab initio total-energy calculations using a plane-wave basis set, *Phys. Rev. B*, 1996, **54**, 11169-11186.
2. G. Kresse and J. Furthmüller, Efficiency of ab-initio total energy calculations for metals and semiconductors using a plane-wave basis set, *Computational Materials Science*, 1996, **6**, 15-50.
3. J. P. Perdew, M. Ernzerhof and K. Burke, Rationale for mixing exact exchange with density functional approximations, *Journal of Chemical Physics*, 1996, **105**, 9982-9985.
4. J. P. Perdew, K. Burke and M. Ernzerhof, Generalized Gradient Approximation Made Simple, *Phys. Rev. Lett.*, 1996, **77**, 3865-3868.
5. S. Grimme, Semiempirical GGA-type density functional constructed with a long-range dispersion correction, *Journal of computational chemistry*, 2006, **27**, 1787-1799.
6. H. A. Hansen, J. B. Varley, A. A. Peterson and J. K. Nørskov, Understanding trends in the electrocatalytic activity of metals and enzymes for CO<sub>2</sub> reduction to CO, *Journal of Physical Chemistry Letters*, 2013, **4**, 388-392.
7. Y. E. Kim, Y. N. Ko, B. S. An, J. Hong, Y. E. Jeon, H. J. Kim, S. Lee, J. Lee and W. Lee, Atomically Dispersed Nickel Coordinated with Nitrogen on Carbon Nanotubes to Boost Electrochemical CO<sub>2</sub> Reduction, *ACS Energy Letters*, 2023, **8**, 3288-3296.
